# Supplementary material
Source: MDPI journal article supplement (https://www.mdpi.com/2075-163X/12/10/1336)
Supplement: s1 [file s1]

## Supplementary Material

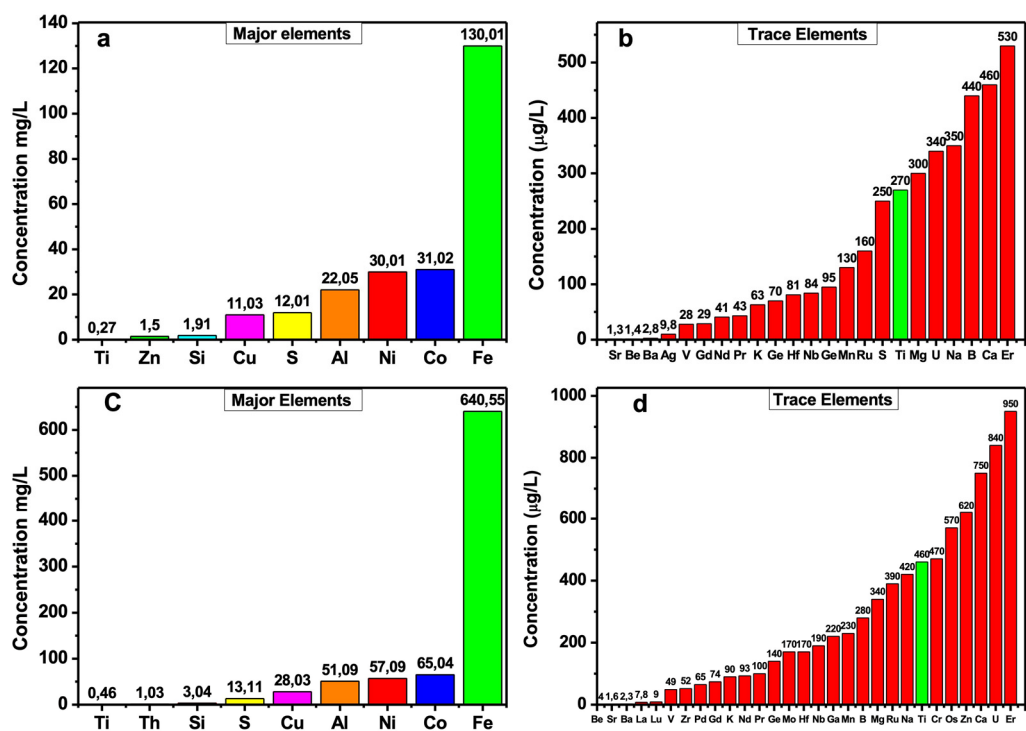

**Figure S1.** The concentration of the dissolved metal ions in an aqua regia solution with (a,b) 10 mL HNO<sub>3</sub> 30 mL HCl and (c,d) 20 mL HNO<sub>3</sub> 60mL HCl.
